# Supplementary material
Source: PubMed Central journal article supplement (PMC5384969)
Supplement: NIHMS851403-supplement-Supp_info.pdf [file NIHMS851403-supplement-Supp_info.pdf]

## **Supp. Material**

### **Deficiency of the sphingosine-1-phosphate lyase SGPL1 is associated with congenital nephrotic syndrome and congenital adrenal calcifications**

Andreas R Janecke<sup>1,2\*</sup>, Ruijuan Xu<sup>3,4\*</sup>, Elisabeth Steichen-Gersdorf<sup>1</sup>, Siegfried Waldegger<sup>1</sup>,  
Andreas Entenmann<sup>1</sup>, Thomas Giner<sup>1</sup>, Iris Krainer<sup>1</sup>, Lukas A Huber<sup>5,11</sup>, Michael W Hess<sup>5</sup>,  
Yaacov Frishberg<sup>6</sup>, Hila Barash<sup>7</sup>, Shay Tzur<sup>8,12</sup>, Nira Schreyer-Shafir<sup>9</sup>, Rivka Sukenik–  
Halevy<sup>9,10</sup>, Tania Zehavi<sup>13</sup>, Annick Raas-Rothschild<sup>7,10\*</sup>, Cungui Mao<sup>3,4\*</sup>, Thomas Müller<sup>1\*</sup>

### **Supporting Figures S1 and S2**

**Supp. Figure S1.**

**A**

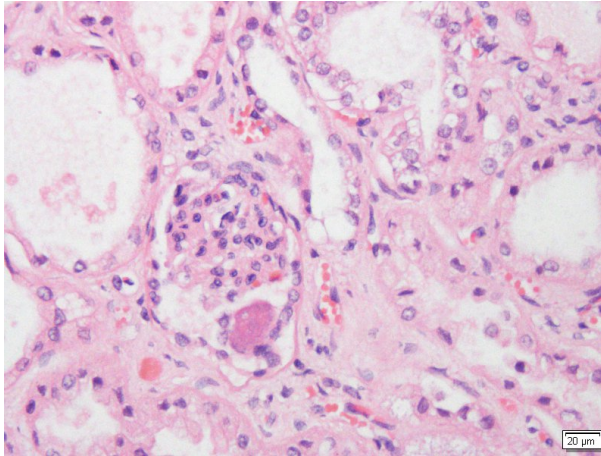

**B**

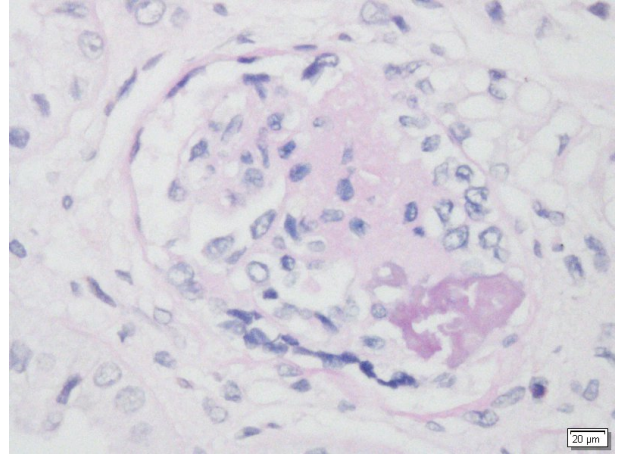

**Supp. Figure S1.** Supporting renal findings in patient 2 at autopsy (3 months of age).

A and B show calcifications in glomeruli. B shows marked sclerosis of glomerular tuft.

**Supp. Figure S2.**

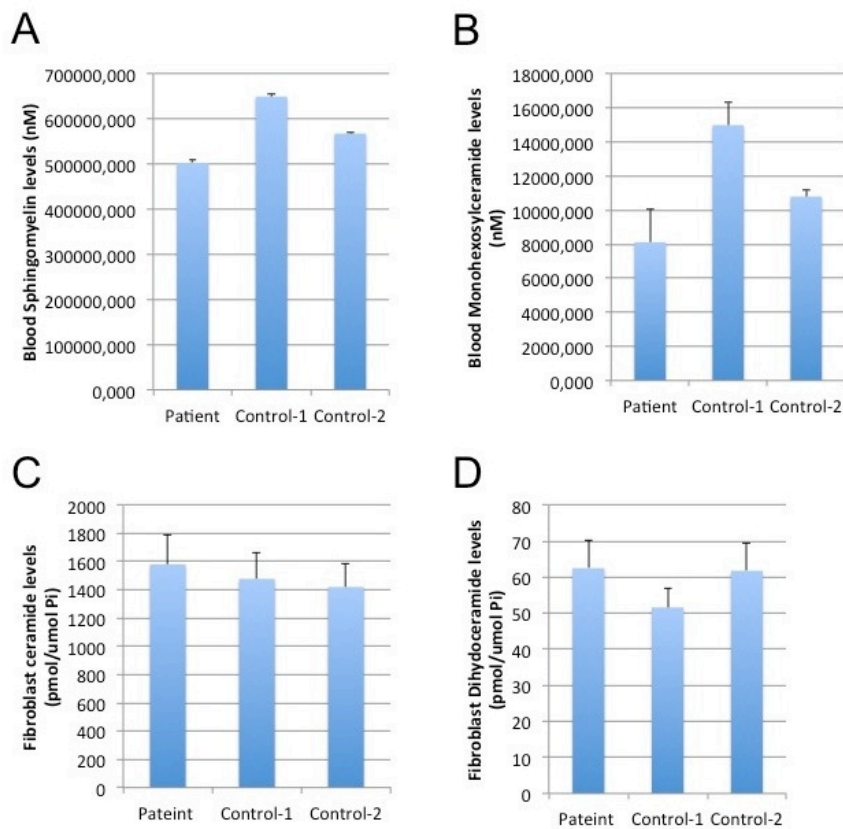

**Supp. Figure S2. Additional sphingolipid levels in blood and skin fibroblast from a patient with a frameshift mutation in the *SGPL1* gene compared with controls.** The patient had lower levels of blood (A) sphingomyelins and (B) monohexosylceramides. In Fibroblasts, (C) total ceramides and (D) total dihydroceramides were not significantly different between patient and controls.
